# Supplementary material for: Highly stereoselective construction of the C2 stereocentre of α-tocopherol (vitamin E) by asymmetric addition of Grignard reagents to ketones
Source: Royal Society of Chemistry journal article supplement (doi:10.1039/c7ob00751e), 2017-01-01
Supplement: c7ob00751e1.pdf [file c7ob00751e1.pdf]

*Supplementary Information for:*

**Highly stereoselective construction of the C2 stereocentre of  $\alpha$ -tocopherol (vitamin E) by  
asymmetric addition of Grignard reagents to ketones**

Bartosz Bieszczad and Declan G. Gilheany\*

Centre for Synthesis and Chemical Biology, School of Chemistry

University College Dublin,

Belfield, Dublin 4, Ireland

Email: [declan.gilheany@ucd.ie](mailto:declan.gilheany@ucd.ie)

Contents:

|                                                                                                              |    |
|--------------------------------------------------------------------------------------------------------------|----|
| 1. General experimental.....                                                                                 | 2  |
| 2. NMR spectra of products and intermediates.....                                                            | 2  |
| 3. Chromatograms of 1-(2,5-dimethoxy-3,4,6-trimethylphenyl)-3,7,11,15-<br>tetramethylhexadecan-3-ol (1)..... | 12 |

## 1. General Experimental

All chemicals were supplied by Aldrich apart from natural phytol, which was supplied by Wuhan ChemFaces Biochemical Co. Microwave assisted reactions were performed using CEM Discover microwave instrument (S-series). Supercritical Fluid Chromatography (SFC) analysis was made using ACQUITY UPC2 system with auto-sampler, combined with PDA Detector Type UPLC eLambda 800 nm. Chiral column Chiralpak® IA-3 of internal diameter of 4.6 mm, 100 mm with particles size of 3  $\mu\text{m}$  was used to separate diastereoisomers in a single case with methanol as a co-solvent. Samples were prepared in heptanes in approximately 1 mg/mL. All NMR analysis was performed using 300, 400 or 500 MHz Varian spectrometers. NMR samples were made in  $\text{CDCl}_3$ .  $^1\text{H}$  and  $^{13}\text{C}$  NMR chemical shifts are given relative to tetramethylsilane.

## 2. NMR spectra of products and intermediates

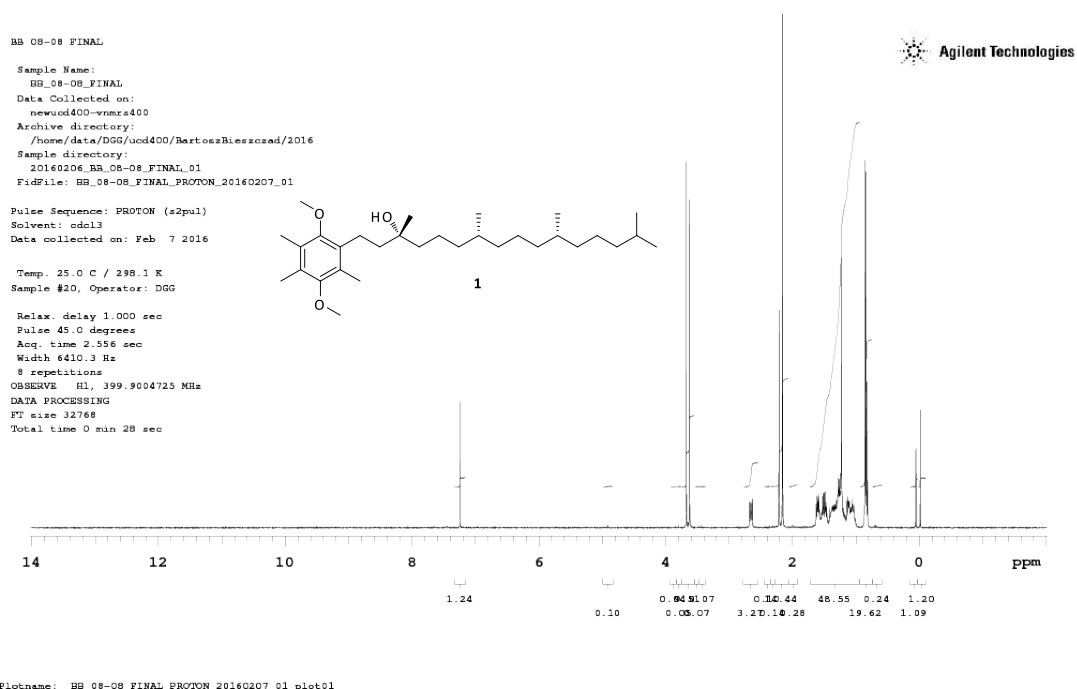

BB 08-12/01

Sample Name:  
BB\_08-12\_01  
Data Collected on:  
newucd300-vnmr300  
Archive directory:  
/home/data/DGG/ucd300/BartosBlesszad/2016  
Sample directory:  
20160222\_BB\_08-12\_01\_01  
FidFile: BB\_08-12\_01\_PROTON\_20160222\_01

Pulse Sequence: PROTON (s2pul)  
Solvent: cdcl3  
Data collected on: Feb 22 2016

Temp. 25.0 C / 298.1 K  
Sample #36, Operator: DGG

Relax. delay 1.000 sec  
Pulse 45.0 degrees  
Acq. time 1.704 sec  
Width 4807.7 Hz  
8 repetitions  
OBSERVE H1, 299.8497678 MHz  
DATA PROCESSING  
FT size 16384  
Total time 0 min 22 sec

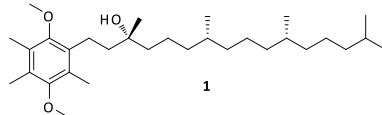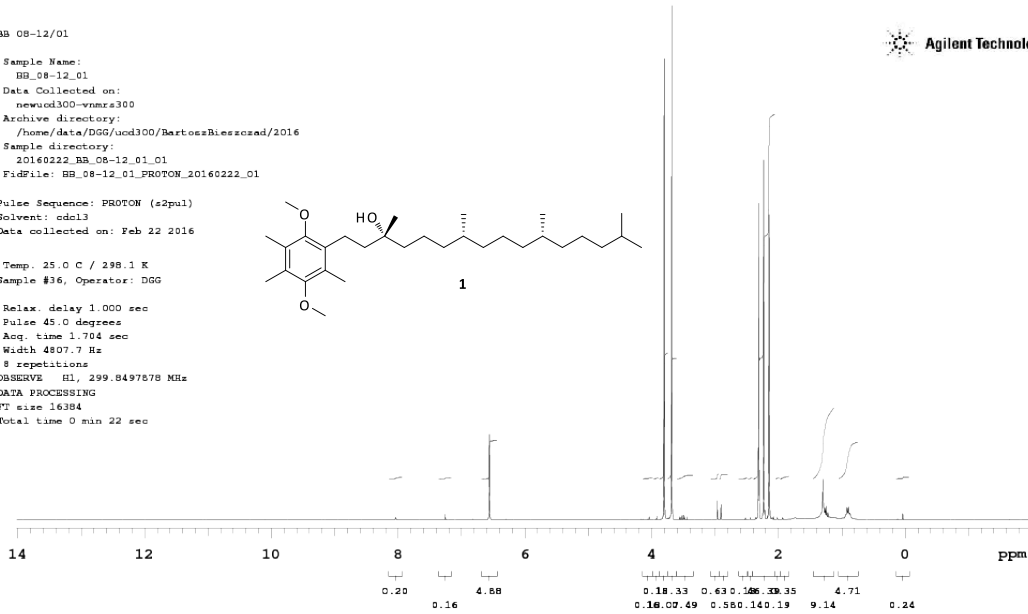

Plotname: BB\_08-12\_01\_PROTON\_20160222\_01\_plot01

BB 08-08 FINAL

Sample Name:  
BB\_08-08\_FINAL  
Data Collected on:  
newucd400-vnmr400  
Archive directory:  
/home/data/DGG/ucd400/BartosBlesszad/2016  
Sample directory:  
20160206\_BB\_08-08\_FINAL\_01  
FidFile: BB\_08-08\_FINAL\_CARBON\_20160207\_01

Pulse Sequence: CARBON (s2pul)  
Solvent: cdcl3  
Data collected on: Feb 6 2016

Temp. 25.0 C / 298.1 K  
Sample #20, Operator: DGG

Relax. delay 1.000 sec  
Pulse 45.0 degrees  
Acq. time 1.000 sec  
Width 25000.0 Hz  
5000 repetitions  
OBSERVE C13, 100.5550538 MHz  
DECOUPLE H1, 399.9024720 MHz  
Power 42 dB  
continuously on  
WALTZ-16 modulated  
DATA PROCESSING  
Line broadening 0.5 Hz  
FT size 65536  
Total time 2 hr, 47 min

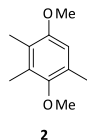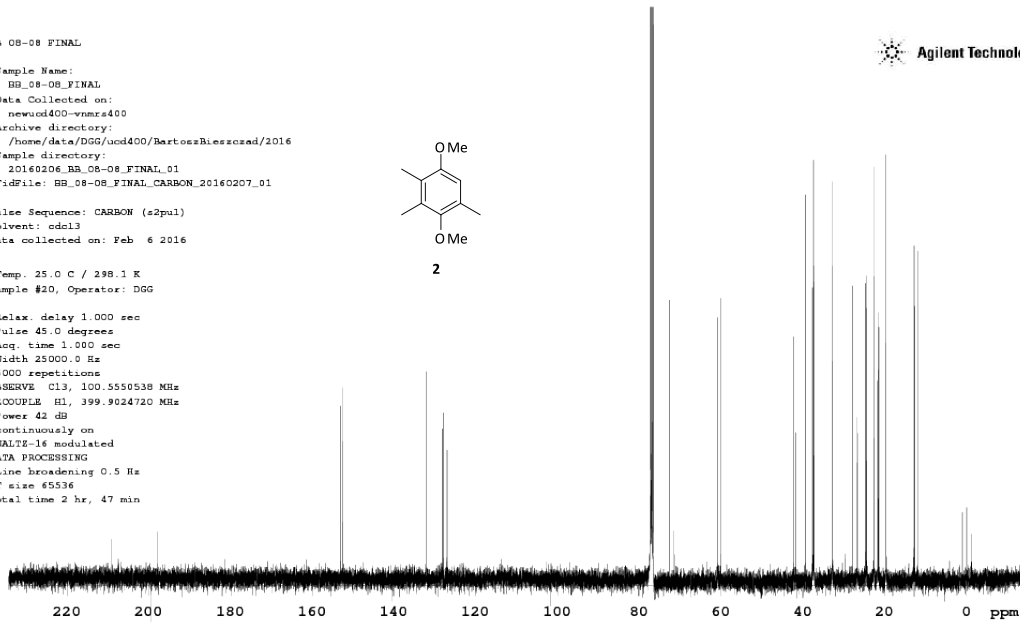

Plotname: BB\_08-08\_FINAL\_CARBON\_20160207\_01\_plot01

BB 08-11/02 F2

Sample Name:  
BB\_08-11\_02\_F2

Data Collected on:  
newud400-wmrs400

Archive directory:  
/home/data/DGG/ucd400/BartoszBieszczad/2016

Sample directory:  
20160212\_BB\_08-11\_02\_F2\_01

FidFile: BB\_08-11\_02\_F2\_PROTON\_20160212\_01

Pulse Sequence: PROTON (s2pul)

Solvent: cdcl3

Data collected on: Feb 12 2016

Temp. 25.0 C / 298.1 K

Sample #14, Operator: DGG

Relax. delay 1.000 sec

Pulse 45.0 degrees

Acq. time 2.556 sec

Width 6410.3 Hz

8 repetitions

OBSERVE H1, 399.9004725 MHz

DATA PROCESSING

FT size 32768

Total time 0 min 28 sec

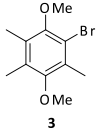

Agilent Technologies

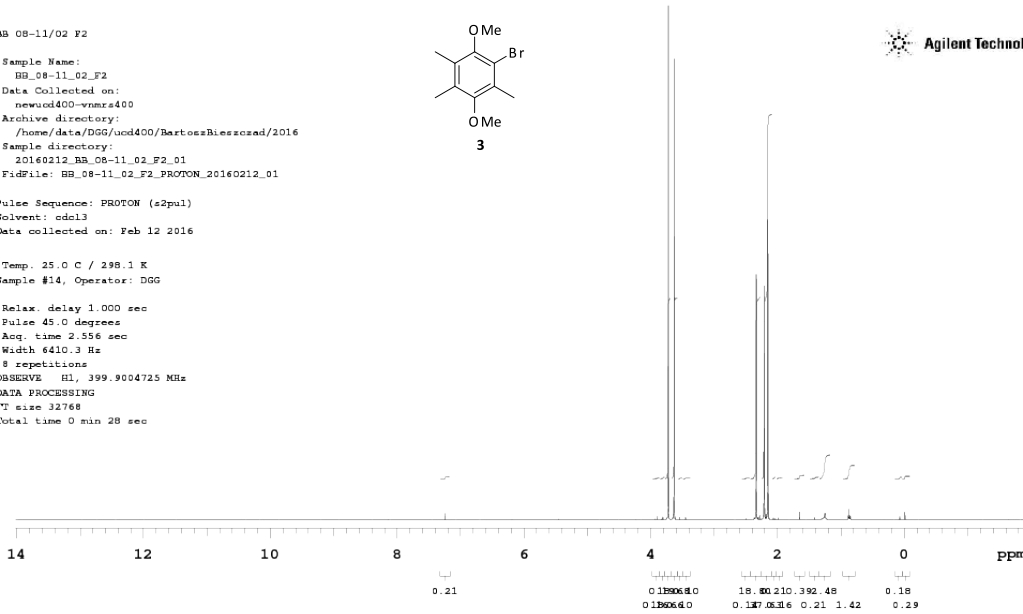

Plotname: BB\_08-11\_02\_F2\_PROTON\_20160212\_01\_plot01

BB 08-51/01

Sample Name:  
BB\_08-51\_01

Data Collected on:  
newud400-wmrs400

Archive directory:  
/home/data/DGG/ucd400/BartoszBieszczad/2016

Sample directory:  
20160712\_BB\_08-51\_01\_01

FidFile: BB\_08-51\_01\_PROTON\_20160712\_01

Pulse Sequence: PROTON (s2pul)

Solvent: cdcl3

Data collected on: Jul 12 2016

Temp. 25.0 C / 298.1 K

Sample #34, Operator: DGG

Relax. delay 1.000 sec

Pulse 45.0 degrees

Acq. time 2.556 sec

Width 6410.3 Hz

8 repetitions

OBSERVE H1, 399.9004725 MHz

DATA PROCESSING

FT size 32768

Total time 0 min 28 sec

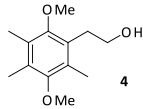

Agilent Technologies

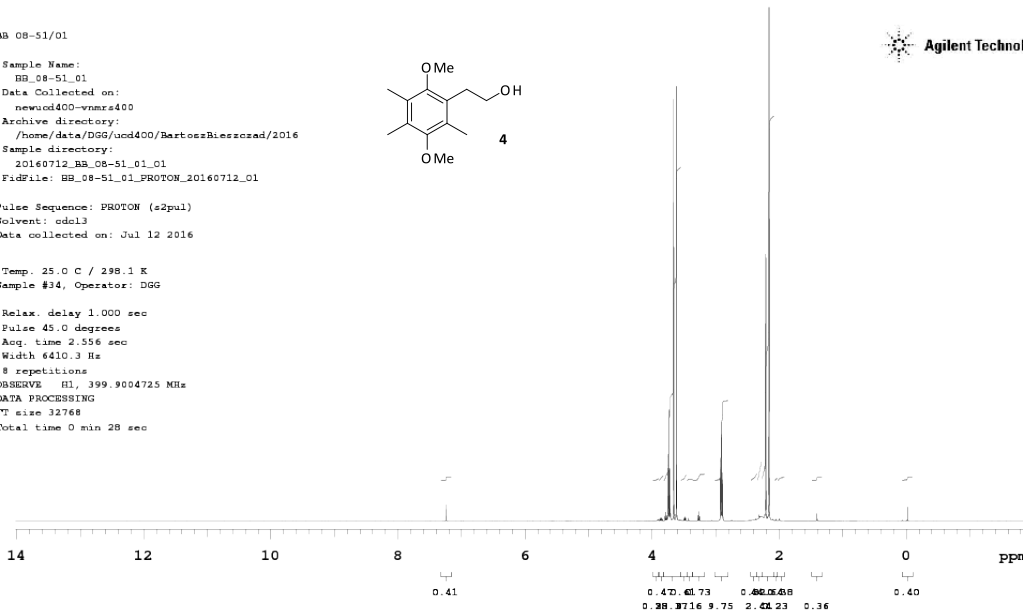

Plotname: BB\_08-51\_01\_PROTON\_20160712\_01\_plot01

BB 08-45/03 III bromide purified

Sample Name:  
BB\_08-45\_03\_III\_bromide\_purified  
Data Collected on:  
newucd400-vnmrs400  
Archive directory:  
/home/data/DGG/ucd400/BartoszBieszczad/2016  
Sample directory:  
20160621\_BB\_08-45\_03\_III\_bromide\_purified\_01  
FidFile: BB\_08-45\_03\_III\_bromide\_purified\_PROTON\_20160621\_01

Pulse Sequence: PROTON (s2pul)  
Solvent: cdcl3  
Data collected on: Jun 21 2016

Temp. 25.0 C / 298.1 K  
Sample #44, Operator: DGG

Relax. delay 1.000 sec  
Pulse 45.0 degrees  
Acq. time 2.556 sec  
Width 6410.3 Hz  
8 repetitions  
OBSERVE H1, 399.9004725 MHz  
DATA PROCESSING  
FT size 32768  
Total time 0 min 28 sec

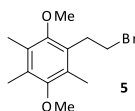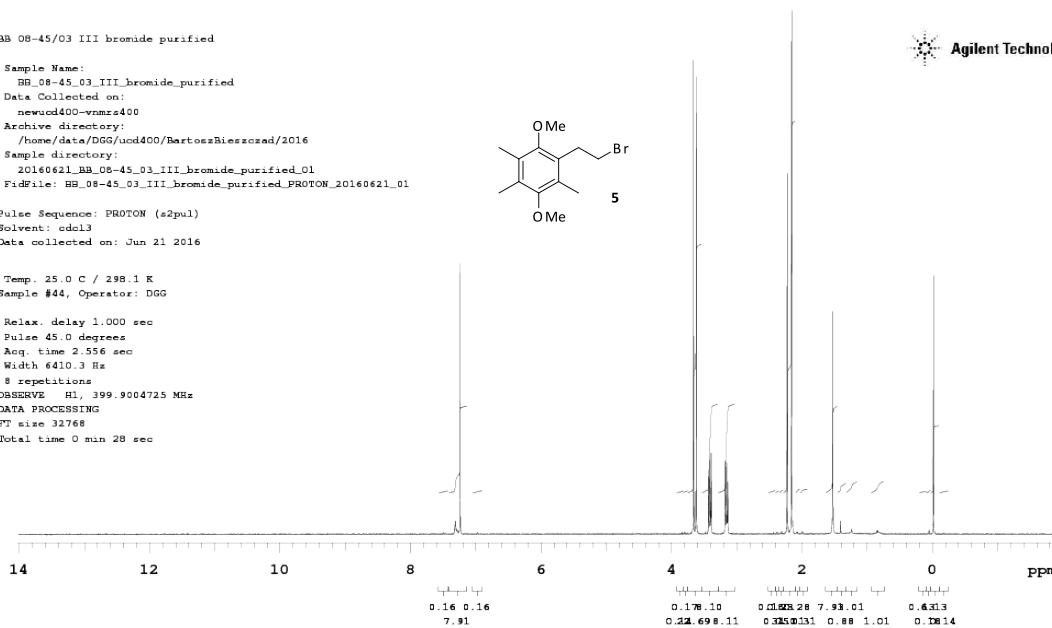

Plotname: BB\_08-45\_03\_III\_bromide\_purified\_PROTON\_20160621\_01\_plot01

BB\_phy

Sample Name:  
BB\_phy  
Data Collected on:  
newucd300-vnmrs300  
Archive directory:  
/home/data/DGG/ucd300/BartoszBieszczad/2016  
Sample directory:  
20160915\_BB\_phy\_01  
FidFile: BB\_phy\_PROTON\_20160915\_01

Pulse Sequence: PROTON (s2pul)  
Solvent: cdcl3  
Data collected on: Sep 15 2016

Temp. 25.0 C / 298.1 K  
Sample #3, Operator: DGG

Relax. delay 1.000 sec  
Pulse 45.0 degrees  
Acq. time 1.704 sec  
Width 4807.7 Hz  
8 repetitions  
OBSERVE H1, 299.8497878 MHz  
DATA PROCESSING  
FT size 16384  
Total time 0 min 22 sec

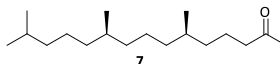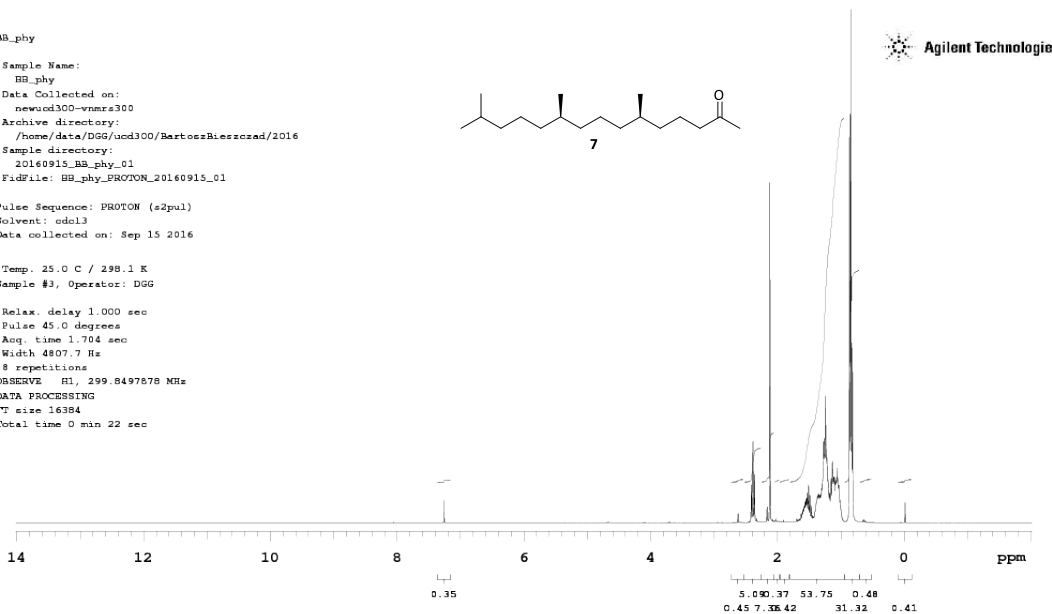

Plotname: BB\_phy\_PROTON\_20160915\_01\_plot01

BB\_08-15\_02\_F1

Sample Name:  
BB\_08-15\_02\_F1  
Data Collected on:  
newud300-wmrs300  
Archive directory:  
/home/data/DGG/ucd300/BartoszBieszczad/2016  
Sample directory:  
20160301\_BB\_08-15\_02\_F1\_01  
FidFile: BB\_08-15\_02\_F1\_PROTON\_20160301\_01

Pulse Sequence: PROTON (s2pul)  
Solvent: cdcl3  
Data collected on: Mar 1 2016

Temp. 25.0 C / 298.1 K  
Sample #46, Operator: DGG

Relax. delay 1.000 sec  
Pulse 45.0 degrees  
Acq. time 1.704 sec  
Width 4807.7 Hz  
8 repetitions  
OBSERVE H1, 299.8497878 MHz  
DATA PROCESSING  
FT size 16384  
Total time 0 min 22 sec

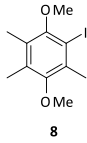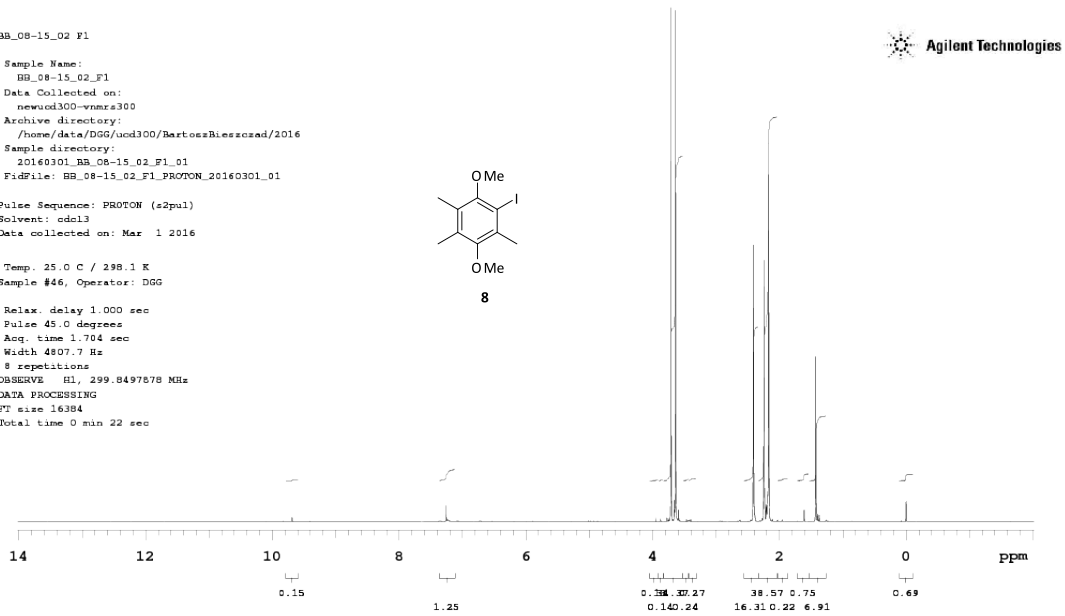

Plotname: BB\_08-15\_02\_F1\_PROTON\_20160301\_01\_plot01

BB\_07-100\_05\_final\_ketone

Sample Name:  
BB\_07-100\_05\_final\_ketone  
Data Collected on:  
newud300-wmrs300  
Archive directory:  
/home/data/DGG/ucd300/BartoszBieszczad/2016  
Sample directory:  
20160113\_BB\_07-100\_05\_final\_ketone\_01  
FidFile: BB\_07-100\_05\_final\_ketone\_PROTON\_20160113\_01

Pulse Sequence: PROTON (s2pul)  
Solvent: cdcl3  
Data collected on: Jan 13 2016

Temp. 25.0 C / 298.1 K  
Sample #72, Operator: DGG

Relax. delay 1.000 sec  
Pulse 45.0 degrees  
Acq. time 1.704 sec  
Width 4807.7 Hz  
8 repetitions  
OBSERVE H1, 299.8497878 MHz  
DATA PROCESSING  
FT size 16384  
Total time 0 min 22 sec

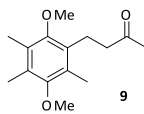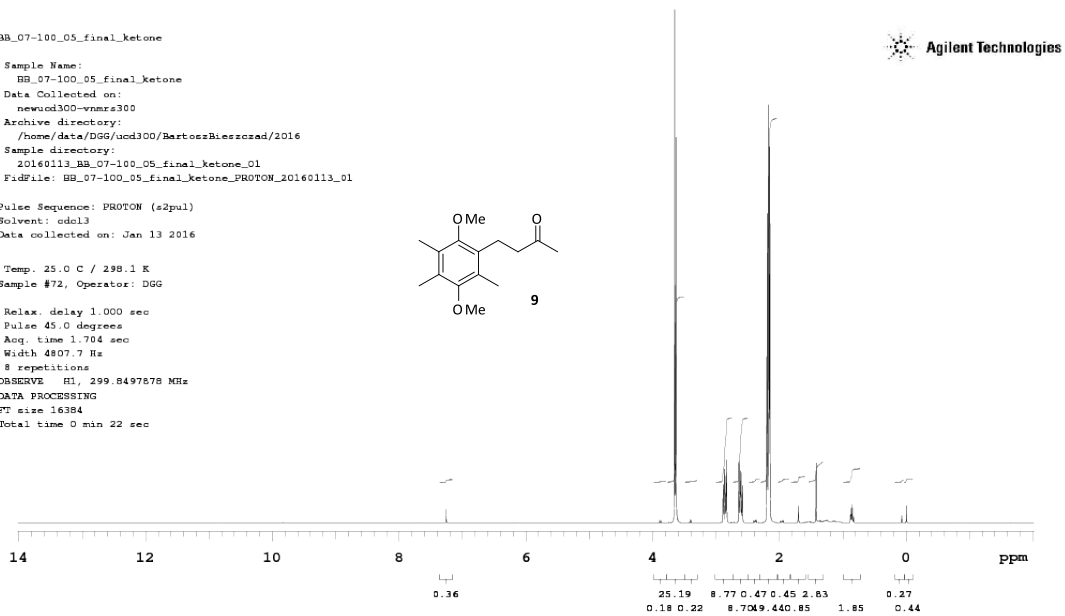

Plotname: BB\_07-100\_05\_final\_ketone\_PROTON\_20160113\_01\_plot01

BB 08-36/01 ester

Sample Name:  
BB\_08-36\_01\_ester  
Data Collected on:  
newuod300-wmra300  
Archive directory:  
/home/data/DGG/ucd300/BartoszBieszczad/2016  
Sample directory:  
20160505\_BB\_08-36\_01\_ester\_01  
FidFile: BB\_08-36\_01\_ester\_PROTON\_20160505\_01

Pulse Sequence: PROTON (s2pul)  
Solvent: cdcl3  
Data collected on: May 5 2016

Temp. 25.0 C / 298.1 K  
Sample #96, Operator: DGG

Relax. delay 1.000 sec  
Pulse 45.0 degrees  
Acq. time 1.704 sec  
Width 4807.7 Hz  
8 repetitions  
OBSERVE H1, 299.8497878 MHz  
DATA PROCESSING  
FT size 16384  
Total time 0 min 22 sec

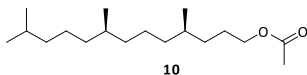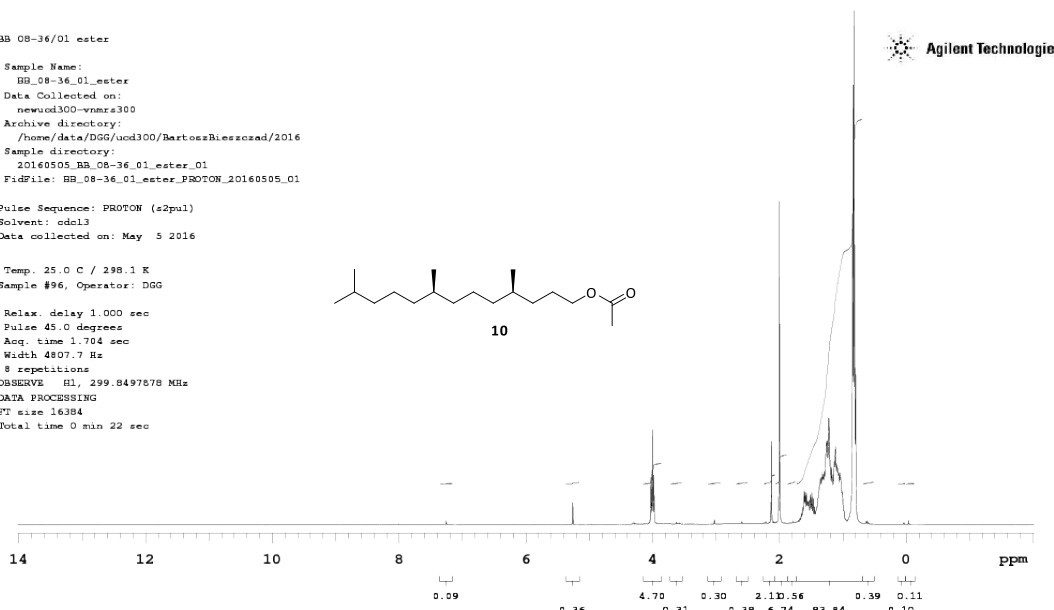

Plotname: BB\_08-36\_01\_ester\_PROTON\_20160505\_01\_plot01

BB 07-98/01

Sample Name:  
BB\_07-98\_01\_alcohol  
Data Collected on:  
newuod300-wmra300  
Archive directory:  
/home/data/DGG/ucd300/BartoszBieszczad/2016  
Sample directory:  
20151222\_BB\_07-98\_01\_alcohol\_01  
FidFile: BB\_07-98\_01\_alcohol\_PROTON\_20151222\_01

Pulse Sequence: PROTON (s2pul)  
Solvent: cdcl3  
Data collected on: Dec 22 2015

Temp. 25.0 C / 298.1 K  
Sample #1, Operator: DGG

Relax. delay 1.000 sec  
Pulse 45.0 degrees  
Acq. time 1.704 sec  
Width 4807.7 Hz  
8 repetitions  
OBSERVE H1, 299.8497878 MHz  
DATA PROCESSING  
FT size 16384  
Total time 0 min 22 sec

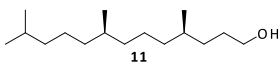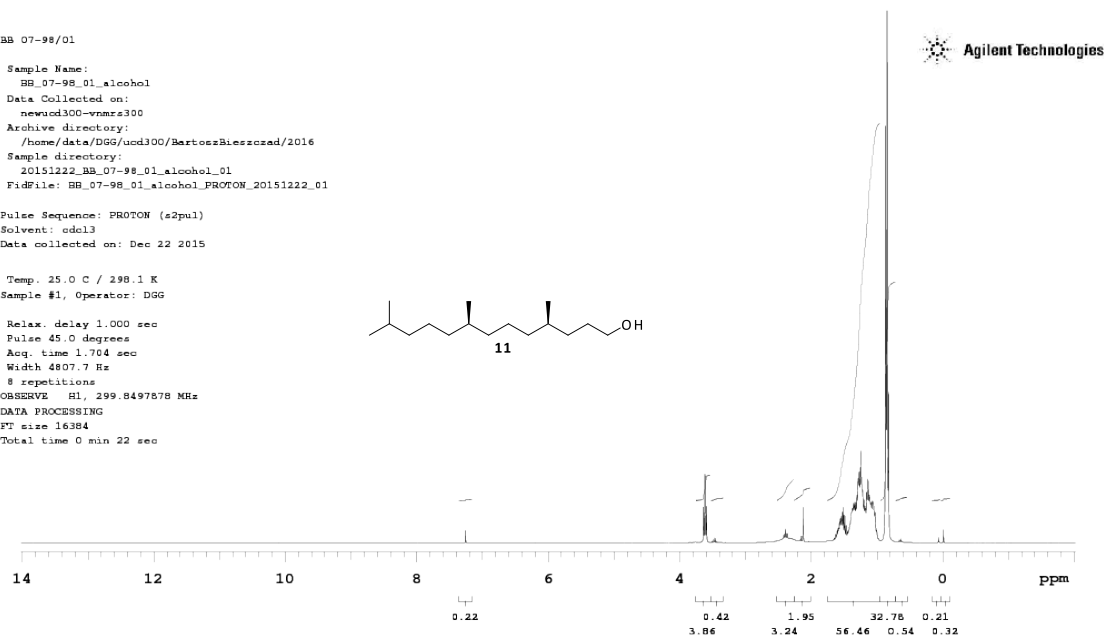

Plotname: BB\_07-98\_01\_alcohol\_PROTON\_20151222\_01\_plot01

BB 07-99/03 F1

Sample Name:  
BB\_07-99\_03\_F1\_bromide\_nat  
Data Collected on:  
newud300-vnmr300  
Archive directory:  
/home/data/DGG/ucd300/BertossBlesszed/2016  
Sample directory:  
20160112\_BB\_07-99\_03\_F1\_bromide\_nat\_01  
FidFile: BB\_07-99\_03\_F1\_bromide\_nat\_PROTON\_20160112\_01

Pulse Sequence: PROTON (s2pul)  
Solvent: cdcl3  
Data collected on: Jan 12 2016

Temp. 25.0 C / 298.1 K  
Sample #36, Operator: DGG

Relax. delay 1.000 sec  
Pulse 45.0 degrees  
Acq. time 1.704 sec  
Width 4807.7 Hz  
8 repetitions  
OBSERVE H1, 299.8497878 MHz  
DATA PROCESSING  
FT size 16384  
Total time 0 min 22 sec

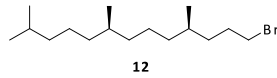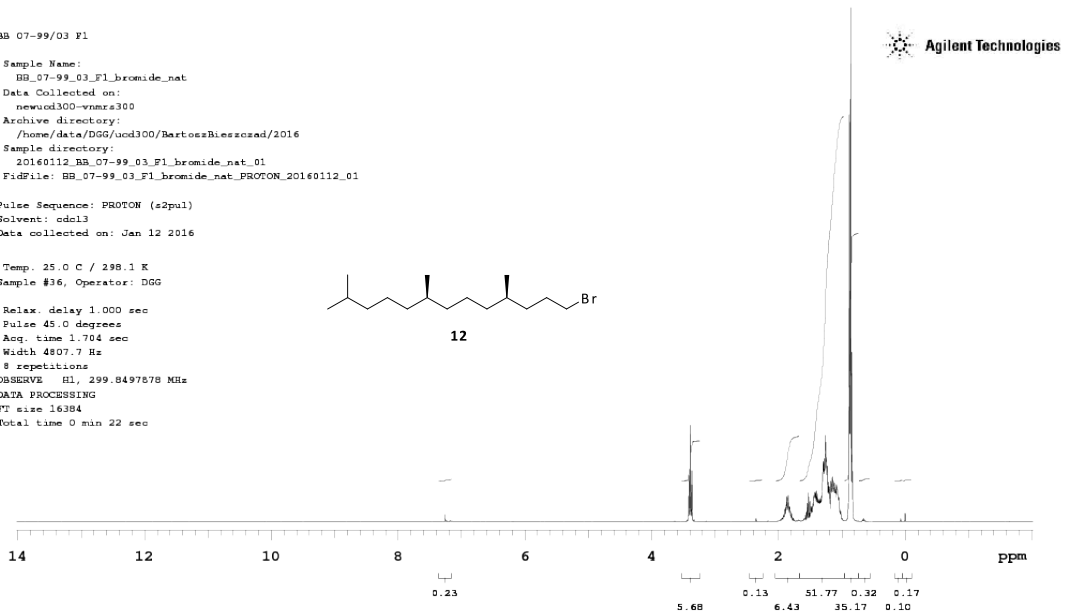

Plotname: BB\_07-99\_03\_F1\_bromide\_nat\_PROTON\_20160112\_01\_plot01

BB 08-36/01 F2

Sample Name:  
BB\_08-36\_01\_F2  
Data Collected on:  
newud300-vnmr300  
Archive directory:  
/home/data/DGG/ucd300/BertossBlesszed/2016  
Sample directory:  
20160504\_BB\_08-36\_01\_F2\_01  
FidFile: BB\_08-36\_01\_F2\_PROTON\_20160504\_01

Pulse Sequence: PROTON (s2pul)  
Solvent: cdcl3  
Data collected on: May 4 2016

Temp. 25.0 C / 298.1 K  
Sample #56, Operator: DGG

Relax. delay 1.000 sec  
Pulse 45.0 degrees  
Acq. time 1.704 sec  
Width 4807.7 Hz  
8 repetitions  
OBSERVE H1, 299.8497878 MHz  
DATA PROCESSING  
FT size 16384  
Total time 0 min 22 sec

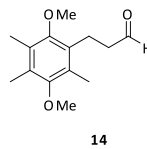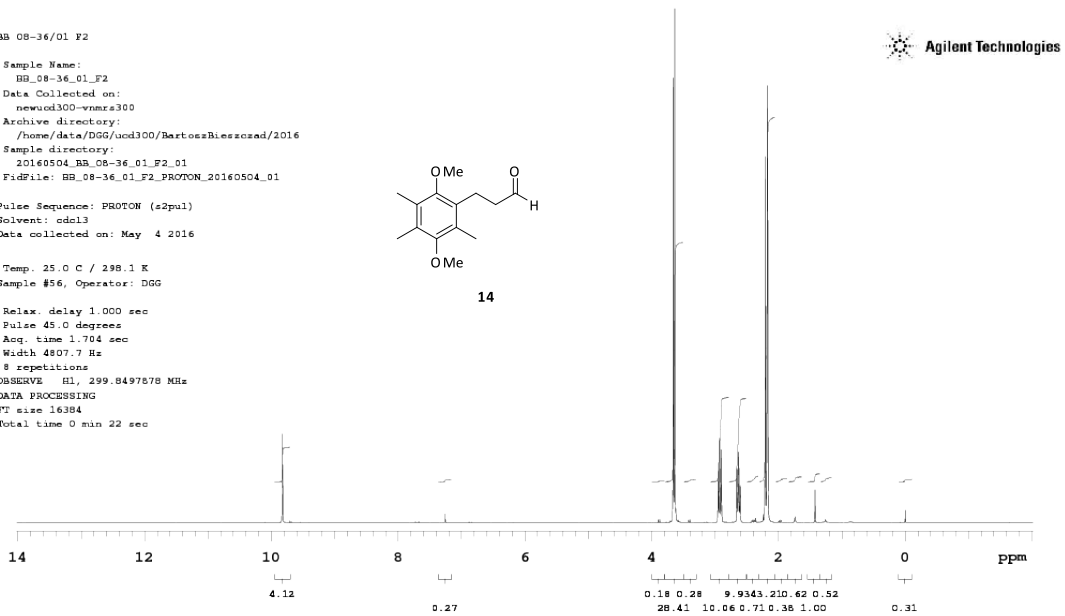

Plotname: BB\_08-36\_01\_F2\_PROTON\_20160504\_01\_plot01



BB 08-40/03 sec alc purified

Sample Name: BB\_08-40\_03\_sec\_alc\_purified  
Data Collected on: newud400-vnmr400  
Archive directory: /home/data/DGG/ucd400/BartoszBieszczad/2016  
Sample directory: 20160511\_BB\_08-40\_03\_sec\_alc\_purified\_01  
FidFile: BB\_08-40\_03\_sec\_alc\_purified\_PROTON\_20160511\_01

Pulse Sequence: PROTON (s2pul)  
Solvent: cdcl3  
Data collected on: May 11 2016

Temp. 25.0 C / 298.1 K  
Sample #28, Operator: DGG

Relax. delay 1.000 sec  
Pulse 45.0 degrees  
Acq. time 2.556 sec  
Width 6410.3 Hz  
8 repetitions  
OBSERVE H1, 399.9004725 MHz  
DATA PROCESSING  
FT size 32768  
Total time 0 min 28 sec

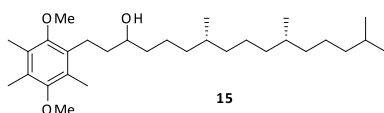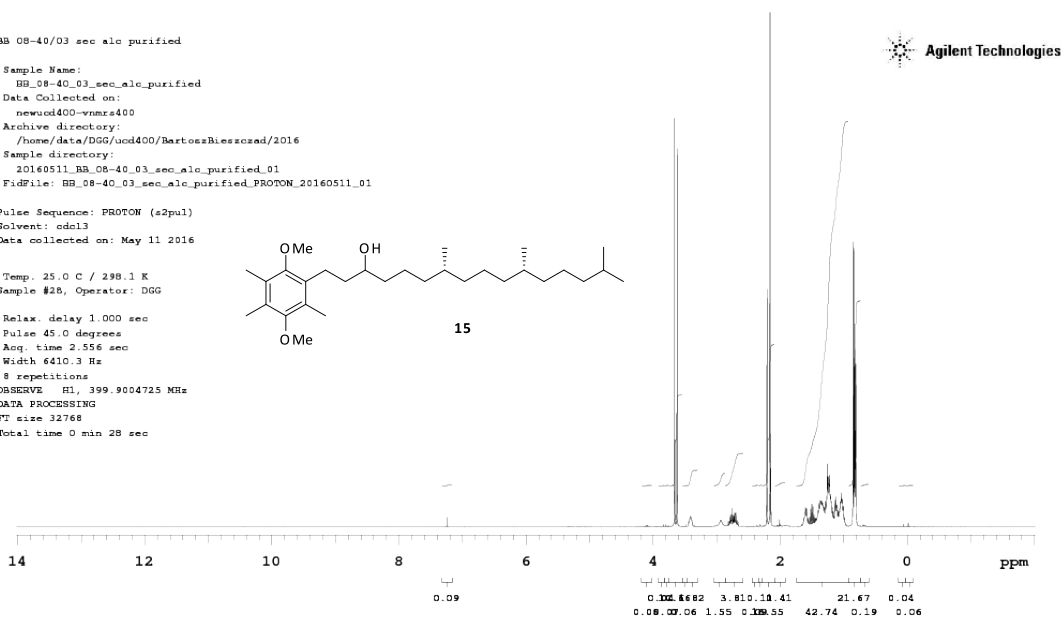

Plotname: BB\_08-40\_03\_sec\_alc\_purified\_PROTON\_20160511\_01\_plot01

BB 08-40/03 sec alc purified

Sample Name: BB\_08-40\_03\_sec\_alc\_purified  
Data Collected on: newud400-vnmr400  
Archive directory: /home/data/DGG/ucd400/BartoszBieszczad/2016  
Sample directory: 20160511\_BB\_08-40\_03\_sec\_alc\_purified\_01  
FidFile: BB\_08-40\_03\_sec\_alc\_purified\_CARBON\_20160511\_01

Pulse Sequence: CARBON (s2pul)  
Solvent: cdcl3  
Data collected on: May 11 2016

Temp. 25.0 C / 298.1 K  
Sample #28, Operator: DGG

Relax. delay 1.000 sec  
Pulse 45.0 degrees  
Acq. time 1.000 sec  
Width 25000.0 Hz  
2000 repetitions  
OBSERVE C13, 100.5550538 MHz  
DECOUPLE H1, 399.9024720 MHz  
Power 42 dB  
continuously on  
WALTZ-16 modulated  
DATA PROCESSING  
Line broadening 0.5 Hz  
FT size 65536  
Total time 1 hr, 7 min

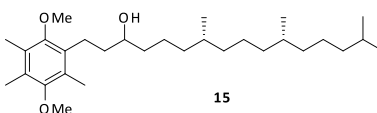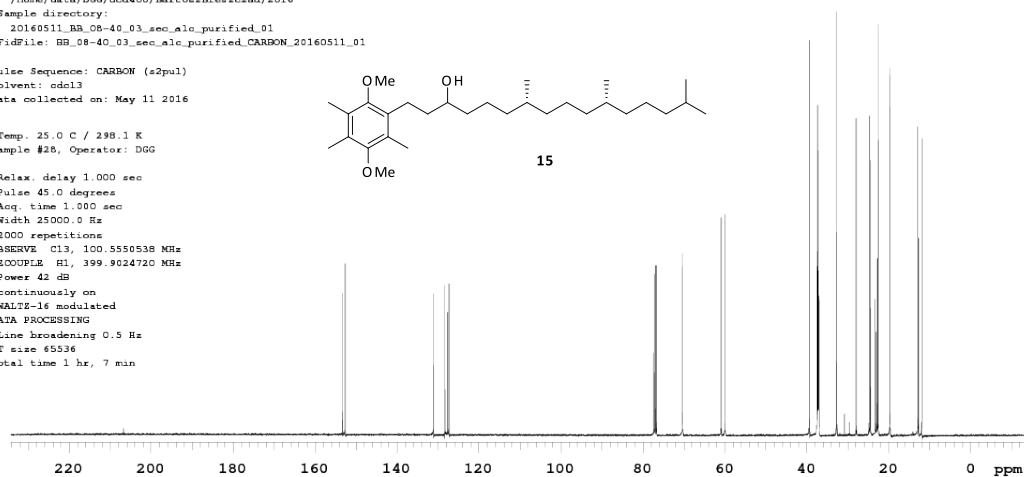

Plotname: BB\_08-40\_03\_sec\_alc\_purified\_CARBON\_20160511\_01\_plot01

BB 08-40/01 F2 ketone

Sample Name:  
BB\_08-40\_01\_F2\_ketone  
Data Collected on:  
newud400-vnmr400  
Archive directory:  
/home/data/DGG/ucd400/BartoszBieszczad/2016  
Sample directory:  
20160615\_BB\_08-40\_01\_F2\_ketone\_01  
FidFile: BB\_08-40\_01\_F2\_ketone\_PROTON\_20160615\_01  
Pulse Sequence: PROTON (s2pu1)  
Solvent: cdcl3  
Data collected on: Jun 15 2016

Temp. 25.0 C / 298.1 K  
Sample #16, Operator: DGG

Relax. delay 1.000 sec  
Pulse 45.0 degrees  
Acq. time 2.556 sec  
Width 6410.3 Hz  
8 repetitions  
OBSERVE H1, 399.9004725 MHz  
DATA PROCESSING  
FT size 32768  
Total time 0 min 28 sec

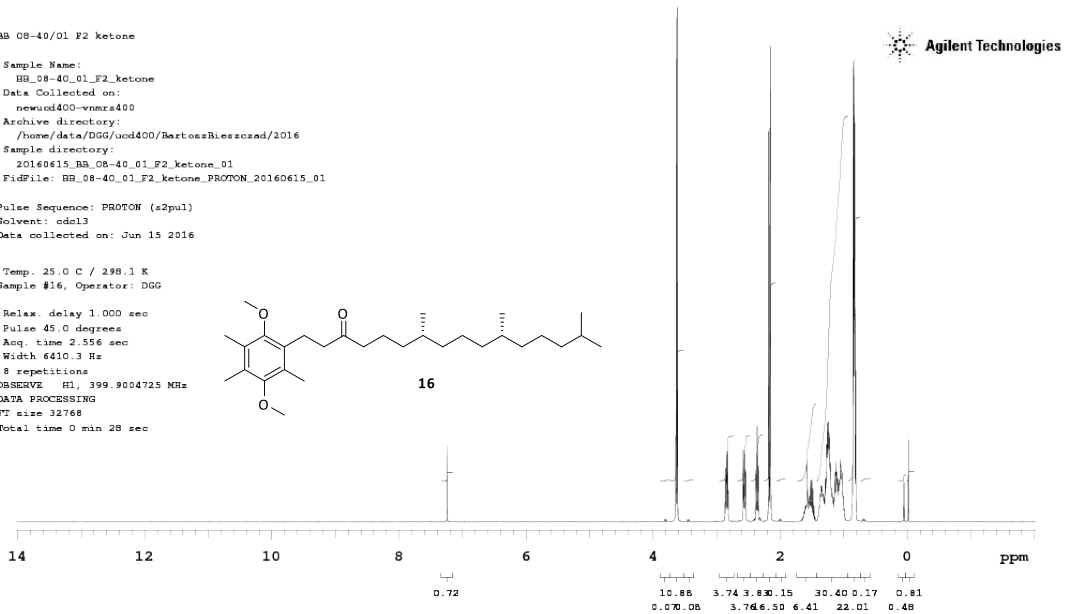

Plotname: BB\_08-40\_01\_F2\_ketone\_PROTON\_20160615\_01\_plot01

BB 08-40/01 F2 ketone

Sample Name:  
BB\_08-40\_01\_F2\_ketone  
Data Collected on:  
newud400-vnmr400  
Archive directory:  
/home/data/DGG/ucd400/BartoszBieszczad/2016  
Sample directory:  
20160615\_BB\_08-40\_01\_F2\_ketone\_01  
FidFile: BB\_08-40\_01\_F2\_ketone\_CARBON\_20160615\_01  
Pulse Sequence: CARBON (s2pu1)  
Solvent: cdcl3  
Data collected on: Jun 15 2016

Temp. 25.0 C / 298.1 K  
Sample #16, Operator: DGG

Relax. delay 1.000 sec  
Pulse 45.0 degrees  
Acq. time 1.000 sec  
Width 25000.0 Hz  
2000 repetitions  
OBSERVE C13, 100.5550538 MHz  
DECOUPLE H1, 399.9024720 MHz  
Power 42 dB  
continuously on  
WALTZ-16 modulated  
DATA PROCESSING  
Line broadening 0.5 Hz  
FT size 65536  
Total time 1 hr, 7 min

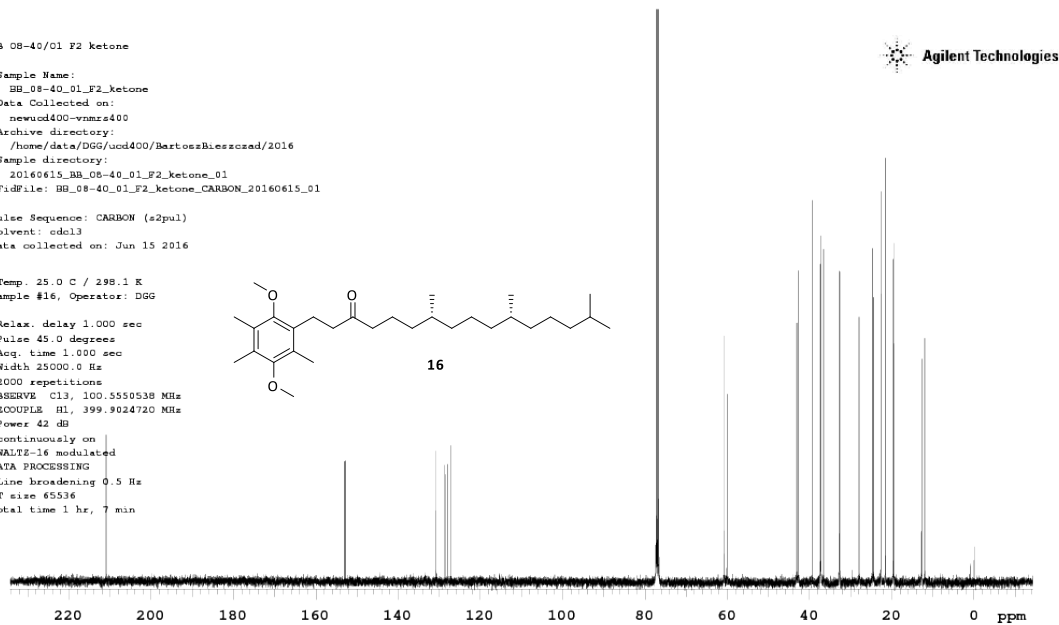

Plotname: BB\_08-40\_01\_F2\_ketone\_CARBON\_20160615\_01\_plot01

BB 08-79/07 quinone

Sample Name:  
BB\_08-79\_07\_quinone  
Data Collected on:  
newucd300.ucd.ie-vmrs300  
Archive directory:  
/home/data/DGG/ucd300/BartoszBieszczad/2017  
Sample directory:  
20170502\_BB\_08-79\_07\_quinone\_01  
Fidfile: BB\_08-79\_07\_quinone\_PROTON\_20170502\_01

Pulse Sequence: PROTON (s2pul)  
Solvent: cdcl3  
Data collected on: May 2 2017

Temp. 25.0 C / 298.1 K  
Sample #70, Operator: DGG

Relax. delay 1.000 sec  
Pulse 45.0 degrees  
Acq. time 1.704 sec  
Width 4807.7 Hz  
64 repetitions  
OBSERVE H1, 299.8497878 MHz  
DATA PROCESSING  
FT size 16384  
Total time 2 min 54 sec

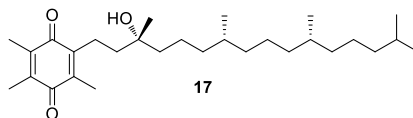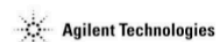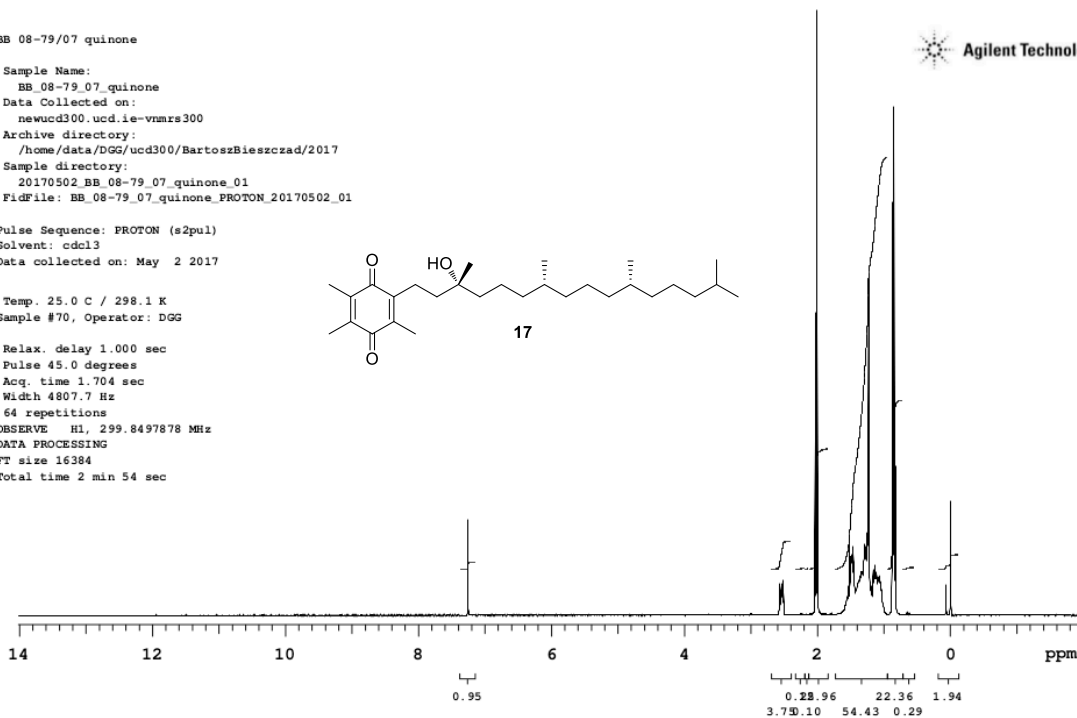

Plotname: BB\_08-79\_07\_quinone\_PROTON\_20170502\_01\_plot01

BB VIT E FINAL

Sample Name:  
BB\_VIT\_E\_FINAL  
Data Collected on:  
newucd300.ucd.ie-vmrs300  
Archive directory:  
/home/data/DGG/ucd300/BartoszBieszczad/2017  
Sample directory:  
20170116\_BB\_VIT\_E\_FINAL\_01  
Fidfile: BB\_VIT\_E\_FINAL\_PROTON\_20170116\_01

Pulse Sequence: PROTON (s2pul)  
Solvent: cdcl3  
Data collected on: Jan 16 2017

Temp. 25.0 C / 298.1 K  
Sample #40, Operator: DGG

Relax. delay 1.000 sec  
Pulse 45.0 degrees  
Acq. time 1.704 sec  
Width 4807.7 Hz  
8 repetitions  
OBSERVE H1, 299.8497878 MHz  
DATA PROCESSING  
FT size 16384  
Total time 0 min 22 sec

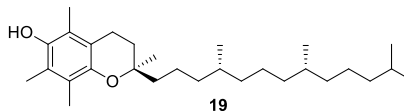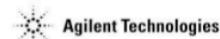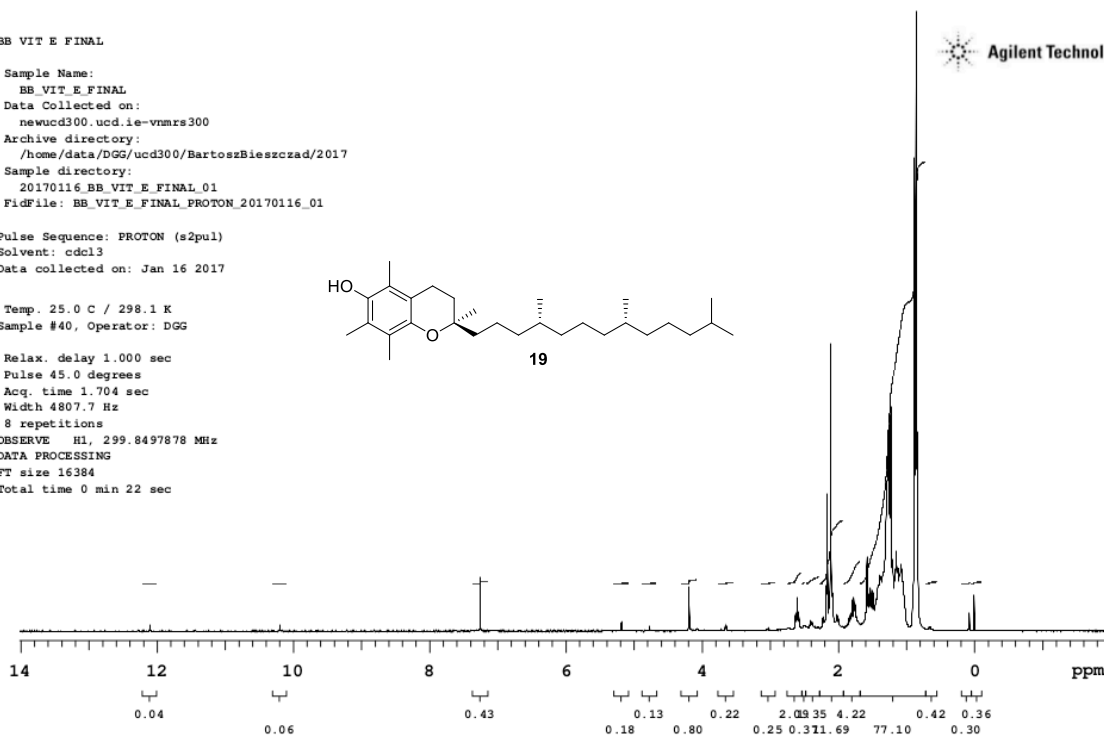

Plotname: BB\_VIT\_E\_FINAL\_PROTON\_20170116\_01\_plot01

3. Chromatograms of 1-(2,5-dimethoxy-3,4,6-trimethylphenyl)-3,7,11,15-tetramethylhexadecan-3-ol (1)

(i) SCF Chromatograms of high dr materials from Route 3

a) (R,R,R) and (S,R,R) – (50 : 50 dr)

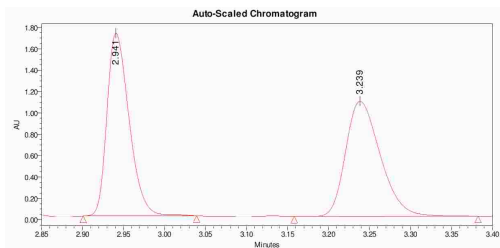

| Peak Results |       |         |         |        |       |        |
|--------------|-------|---------|---------|--------|-------|--------|
| Name         | RT    | Area    | Height  | Amount | Units | % Area |
| 1            | 2.941 | 3220436 | 1713660 |        |       | 50.46  |
| 2            | 3.239 | 3161196 | 1077738 |        |       | 49.54  |

b) (S,R,R) – diastereoisomer – 95 : 5 dr

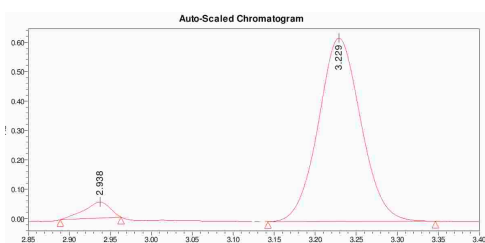

| Peak Results |       |         |        |        |       |        |
|--------------|-------|---------|--------|--------|-------|--------|
| Name         | RT    | Area    | Height | Amount | Units | % Area |
| 1            | 2.938 | 119150  | 54303  |        |       | 5.03   |
| 2            | 3.229 | 2250052 | 623906 |        |       | 94.97  |

c) (R,R,R) – diastereoisomer – 96 : 4 dr

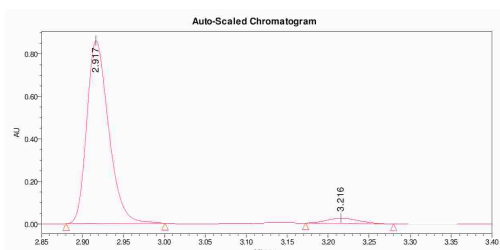

| Peak Results |       |         |        |        |       |        |
|--------------|-------|---------|--------|--------|-------|--------|
| Name         | RT    | Area    | Height | Amount | Units | % Area |
| 1            | 2.917 | 1600452 | 860266 |        |       | 95.91  |
| 2            | 3.216 | 68277   | 24903  |        |       | 4.09   |

(ii) Best HPLC Chromatograms (OJH column, resolution = 0.4)

a) (R,R,R) and (S,R,R) – (50 : 50 dr) :

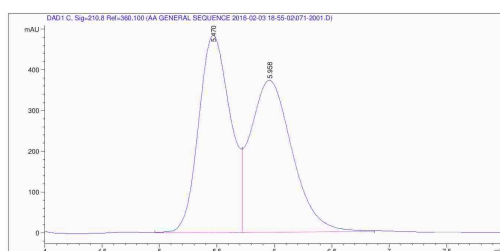

b) **(R,R,R)** – diastereoisomer of high dr from Route 3

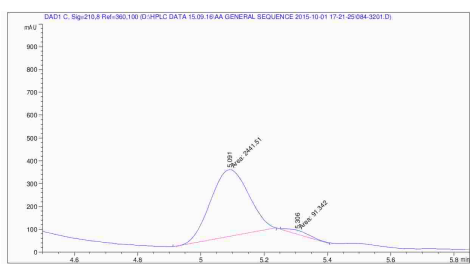

c) **(R,R,R)** – diastereoisomer of moderate dr from Route 2

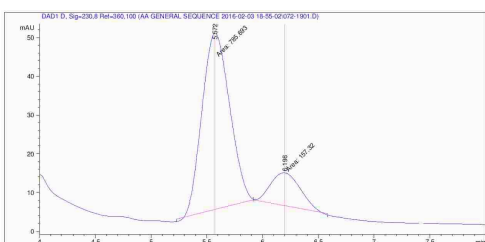

(iii) **SCF Chromatogram: (S,R,R)** – diastereoisomer of moderate dr from Route 1

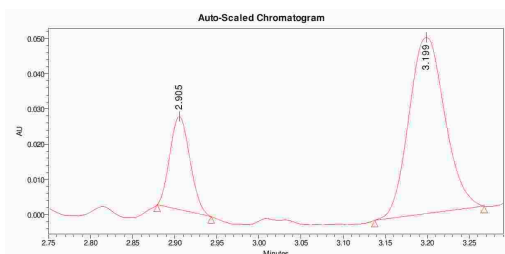

| Peak Results |       |        |        |        |       |        |
|--------------|-------|--------|--------|--------|-------|--------|
| Name         | RT    | Area   | Height | Amount | Units | % Area |
| 1            | 2.905 | 43838  | 26471  |        |       | 22.74  |
| 2            | 3.199 | 148906 | 50069  |        |       | 77.26  |
